# Supplementary material
Source: PubMed Central journal article supplement (PMC1569159)

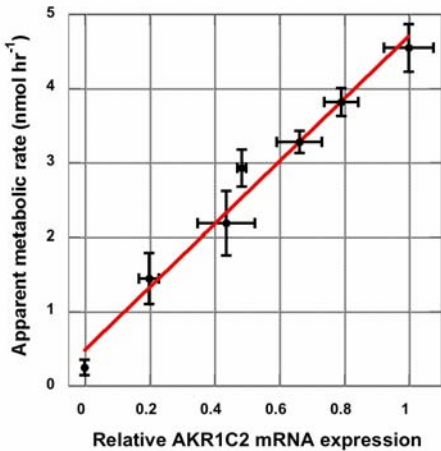

Supplement: pnas_0604672103_1.pdf [file pnas_0604672103_1.pdf]

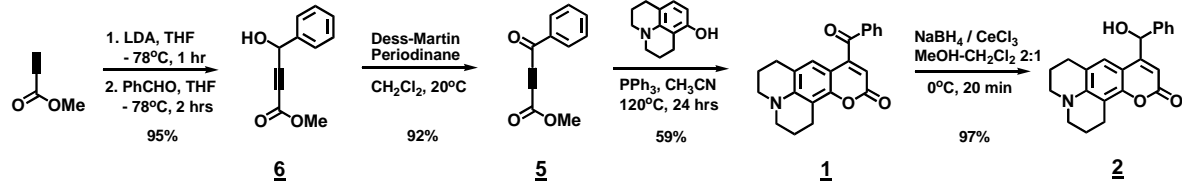

Supplement: pnas_0604672103_2.pdf [file pnas_0604672103_2.pdf]
